# Supplementary material for: Magnetic mesoporous carbonated hydroxyapatite microspheres with hierarchical nanostructure for drug delivery systems
Source: Royal Society of Chemistry journal article supplement (doi:10.1039/c1cc15190h), 2011-01-01
Supplement: c1cc15190h.pdf [file c1cc15190h.pdf]

## Electronic Supplementary Information (ESI)

### **Magnetic Mesoporous Carbonated Hydroxyapatite Microspheres with Hierarchical Nanostructure for Drug Delivery System**

**Ya-Ping Guo<sup>a,b</sup>, Li-Hua Guo<sup>b</sup>, Yong-bo Yao<sup>b</sup>, Cong-Qin Ning<sup>a\*</sup> and Ya-Jun Guo<sup>b</sup>**

*<sup>a</sup> State Key Laboratory of High Performance Ceramics and Superfine Microstructure, Shanghai Institute of Ceramics, Chinese Academy of Sciences, Shanghai 200050, China.*

*Fax: +86-21-52413903; Tel: +86-21-54214815; E-mail: cqning@mail.sic.ac.cn*

*<sup>b</sup> Department of Chemistry, Shanghai Normal University, Shanghai 200234, China.*

*Fax: +86-21-64321951; Tel: +86-21-64321951; E-mail: ypguo@shnu.edu.cn*

### **Preparation of the MHMs**

Briefly, Fe<sub>3</sub>O<sub>4</sub> nanoparticles (0.2 g) were added into the calcium chloride solution with HCl-soluble nacre materials, followed by ultrasonic treatment for 10 min. Subsequently, the rapid-mixing reaction was performed by pouring the Na<sub>2</sub>CO<sub>3</sub> solution into 100 ml of the above mixed solution. The obtained CaCO<sub>3</sub>/Fe<sub>3</sub>O<sub>4</sub> microspheres (0.6 g) were added into a disodium hydrogen phosphate solution. The mixtures were sealed in polytetrafluoroethylene (Teflon)-lined stainless steel autoclaves and hydrothermal transformations took place at 140 °C for 24 h. The obtained products (MHMs) were washed with deionized water, and then dried in a convection oven.

### **The source and function of HCl-soluble organic materials extracted from the nacre**

The nacre of *Corbicula fluminea* was collected from Zhejiang province in China, composed of 98.1 wt % mineral phases and 1.9 wt % organic components. The chemical elements of nacre mainly include O (48.026 wt.%), Na (0.281 wt.%), Al (0.215 wt.%), Si (0.058 wt.%), S (0.022 wt.%), Ca (40.957 wt.%), Sr (0.083 wt.%), and other elements such as C, H, and N (10.4 wt.%).

The nacre was demineralized with a 1.0 mol/l HCl solution overnight, and diluted with deionized water till the concentration of calcium ions was 0.25 mol/l. After centrifugation and separation from the HCl-insoluble material, the pH-value of the organic calcium chloride (CaCl<sub>2</sub>) solution was adjusted up to seven by adding a

few drops of 1.0 mol/l NaOH. This yielded a calcium chloride solution, and the organic materials in the solution were termed HCl-soluble organic materials.

In the present work, the HCl-soluble organic materials are used as additive to control the morphology of  $\text{CaCO}_3/\text{Fe}_3\text{O}_4$  microspheres. In the absence of the HCl-soluble organic materials, the obtained products are irregular particles. However, the presence of the HCl-soluble organic materials has not obviously effects on the mesoporous structure of the MHMs, as demonstrated by the previous report (Y.P. Guo, et al. *Micropor. Mesopor. Mat.*, 2009, **118**, 480-488;).

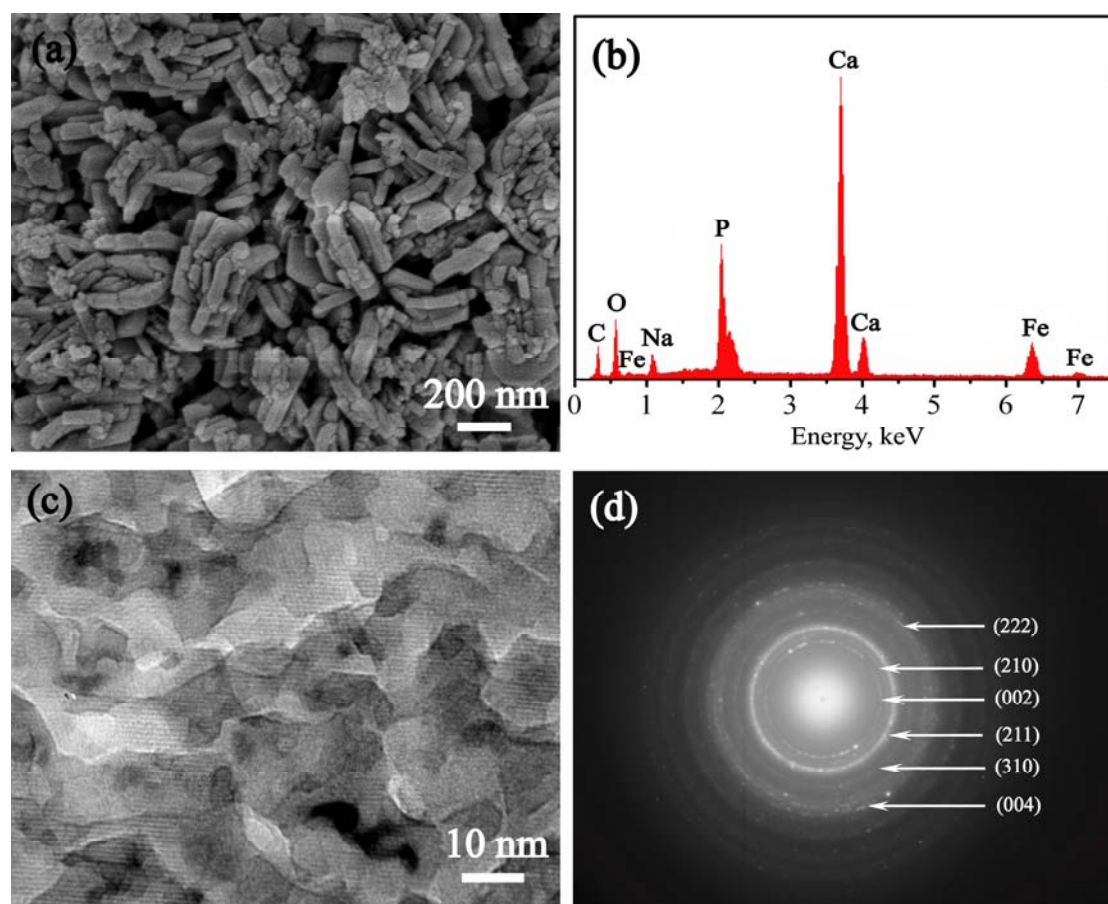

Fig. S1. (a) SEM image with high magnification; (b) EDS spectrum; (c) TEM image; and (d) electron diffraction pattern of MHMs.

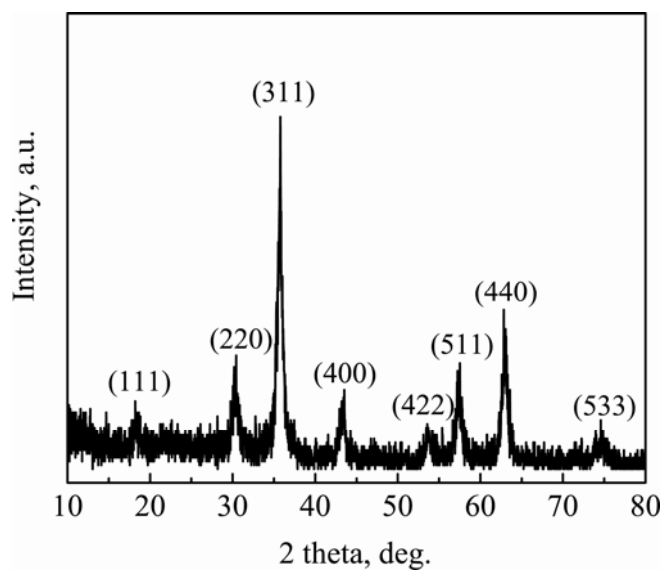

Fig. S2. XRD pattern of Fe<sub>3</sub>O<sub>4</sub> nanoparticles.

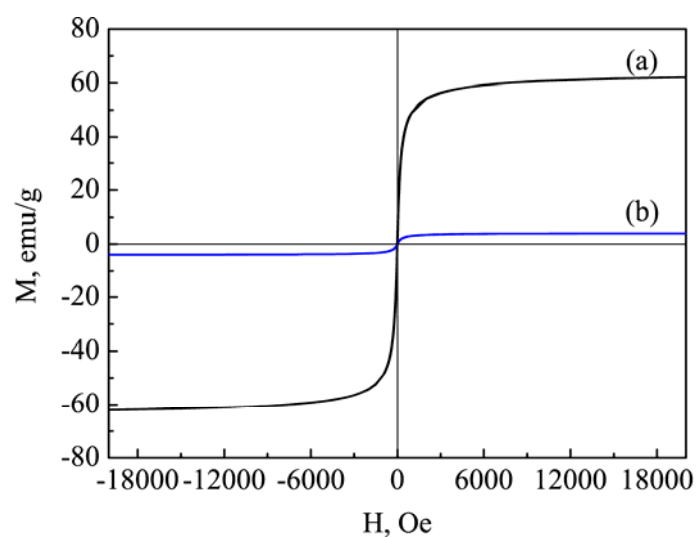

Fig. S3. Magnetization of different samples as a function of the applied field measured at 298 K: (a) Fe<sub>3</sub>O<sub>4</sub> and (b) MHMs.

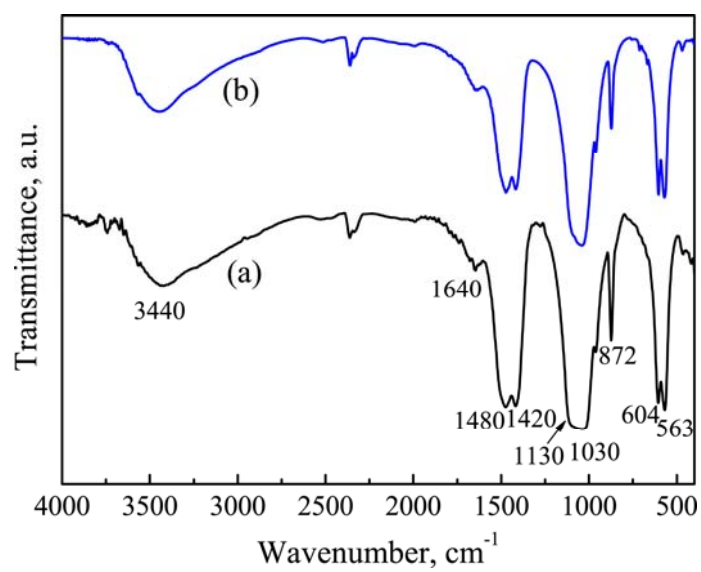

Fig. S4. FTIR spectra of samples: (a) MHMs and (b) HHMs.
